# Supplementary material for: Water regime history drives responses of soil Namib Desert microbial communities to wetting events
Source: PubMed Central journal article supplement (PMC4508562; doi:10.1038/srep12263), 2015-07-21

## **Supplementary Information**

### **Water regime history drives responses of soil Namib Desert microbial communities to wetting events**

Aline Frossard<sup>1</sup>, Jean-Baptiste Ramond<sup>1</sup>, Mary Seely<sup>2,3</sup> and Don A. Cowan<sup>1</sup>

- (1) Centre for Microbial Ecology and Genomics (CMEG), Genomic Research Institute,  
University of Pretoria, Pretoria, South Africa.
- (2) Gobabeb Research and Training Centre (GTRC), PO Box 953, Walvis Bay, Namibia.
- (3) Animal, Plant and Environmental Sciences, University of the Witwatersrand,  
Johannesburg, South Africa.

**Supp. Table 1.** Fit of soil physico-chemical parameters to the fungal and bacterial community structures. Fit determined by PERMANOVA. DTR = Daily Temperature Range, DHR = Daily Humidity Range, WRC = Water retention capacity.

|                                                    | Fungi          |               | Bacteria       |               |
|----------------------------------------------------|----------------|---------------|----------------|---------------|
|                                                    | r <sup>2</sup> | P             | r <sup>2</sup> | P             |
| DTR (°C)                                           | 0.50           | <b>0.001*</b> | 0.29           | <b>0.001*</b> |
| DHR (%RH)                                          | 0.47           | <b>0.001*</b> | 0.08           | <b>0.003*</b> |
| WRC (g kPa <sup>-1</sup> )                         | 0.45           | <b>0.001*</b> | 0.08           | <b>0.006*</b> |
| pH                                                 | 0.43           | <b>0.001*</b> | 0.09           | <b>0.002*</b> |
| Organic C (%)                                      | 0.36           | <b>0.001*</b> | 0.34           | 0.100         |
| NH <sub>4</sub> <sup>+</sup> (μg g <sup>-1</sup> ) | 0.09           | <b>0.002*</b> | 0.17           | <b>0.001*</b> |
| NO <sub>3</sub> <sup>-</sup> (μg g <sup>-1</sup> ) | 0.41           | <b>0.001*</b> | 0.08           | <b>0.003*</b> |
| P (μg g <sup>-1</sup> )                            | 0.64           | <b>0.001*</b> | 0.13           | <b>0.001*</b> |
| CEC (cmol <sup>+</sup> kg <sup>-1</sup> )          | 0.31           | <b>0.001*</b> | 0.08           | <b>0.002*</b> |
| Ca <sup>+</sup> (μg g <sup>-1</sup> )              | 0.46           | <b>0.001*</b> | 0.07           | <b>0.007*</b> |
| K <sup>+</sup> (μg g <sup>-1</sup> )               | 0.52           | <b>0.001*</b> | 0.07           | <b>0.006*</b> |
| Mg <sup>+</sup> (μg g <sup>-1</sup> )              | 0.45           | <b>0.001*</b> | 0.01           | 0.386         |
| Na <sup>+</sup> (μg g <sup>-1</sup> )              | 0.40           | <b>0.001*</b> | 0.01           | 0.667         |
| S (μg g <sup>-1</sup> )                            | 0.32           | <b>0.001*</b> | 0.00           | 0.816         |
| Coarse sand (<2 mm; %)                             | 0.63           | <b>0.001*</b> | 0.13           | <b>0.001*</b> |
| Medium sand (<630 μm; %)                           | 0.32           | <b>0.001*</b> | 0.21           | <b>0.001*</b> |
| Fine sand (<200 μm; %)                             | 0.17           | <b>0.001*</b> | 0.21           | <b>0.001*</b> |
| Silt (<50 μm; %)                                   | 0.54           | <b>0.001*</b> | 0.12           | <b>0.001*</b> |
| Clay (<2 μm; %)                                    | 0.42           | <b>0.001*</b> | 0.07           | <b>0.007*</b> |

**Supp. Table 2.** PERMANOVA table showing differences in the **fungal** community structure among treatments and specific contrasts of treatments for all sampling dates and at each sampling times separately for riverbed and gravel samples. DF = degree of freedom: numerator, total. F = F value. P = P value.

|           | Factor / Contrast    | Riverbed |       |               | Gravel Plain |       |               |
|-----------|----------------------|----------|-------|---------------|--------------|-------|---------------|
|           |                      | DF       | F     | P             | DF           | F     | P             |
| All dates | Treatment            | 3, 79    | 1.381 | <b>0.049*</b> | 3, 83        | 1.518 | 0.079         |
|           | Sampling             | 6, 79    | 1.905 | <b>0.001*</b> | 6, 83        | 1.415 | 0.054         |
|           | Treatment : sampling | 18, 79   | 0.734 | 1.000         | 18, 83       | 1.143 | 0.198         |
| 4 h       | Treatment            | 3, 10    | 0.592 | 0.940         | 3, 11        | 1.304 | 0.309         |
|           | C vs. F              | 1, 10    | 0.819 | 0.577         | 1, 11        | 2.471 | 0.074         |
|           | C vs. LR             | 1, 10    | 0.452 | 0.890         | 1, 11        | 0.452 | 0.831         |
|           | C vs. HR             | 1, 10    | 0.263 | 0.990         | 1, 11        | 0.547 | 0.760         |
|           | F vs. LR             | 1, 10    | 1.802 | 0.125         | 1, 11        | 2.813 | <b>0.022*</b> |
|           | F vs. HR             | 1, 10    | 1.004 | 0.407         | 1, 11        | 0.957 | 0.363         |
|           | LR vs. HR            | 1, 10    | 0.550 | 0.833         | 1, 11        | 0.603 | 0.701         |
| 1 day     | Treatment            | 3, 11    | 0.695 | 0.843         | 3, 11        | 2.989 | 0.068         |
|           | C vs. F              | 1, 11    | 0.785 | 0.595         | 1, 11        | 0.118 | 0.954         |
|           | C vs. LR             | 1, 11    | 1.143 | 0.298         | 1, 11        | 6.078 | <b>0.022*</b> |
|           | C vs. HR             | 1, 11    | 0.635 | 0.800         | 1, 11        | 0.778 | 0.446         |
|           | F vs. LR             | 1, 11    | 0.415 | 0.959         | 1, 11        | 5.909 | <b>0.024*</b> |
|           | F vs. HR             | 1, 11    | 0.768 | 0.621         | 1, 11        | 0.786 | 0.415         |
|           | LR vs. HR            | 1, 11    | 0.722 | 0.704         | 1, 11        | 1.777 | 0.192         |
| 2 days    | Treatment            | 3, 11    | 0.652 | 0.969         | 3, 11        | 0.767 | 0.753         |
|           | C vs. F              | 1, 11    | 0.571 | 0.937         | 1, 11        | 0.773 | 0.611         |
|           | C vs. LR             | 1, 11    | 0.557 | 0.924         | 1, 11        | 1.129 | 0.294         |
|           | C vs. HR             | 1, 11    | 0.855 | 0.616         | 1, 11        | 0.251 | 0.971         |
|           | F vs. LR             | 1, 11    | 0.616 | 0.879         | 1, 11        | 0.865 | 0.569         |
|           | F vs. HR             | 1, 11    | 0.567 | 0.930         | 1, 11        | 0.805 | 0.598         |
|           | LR vs. HR            | 1, 11    | 1.060 | 0.366         | 1, 11        | 1.048 | 0.342         |
| 8 days    | Treatment            | 3, 10    | 0.757 | 0.877         | 3, 11        | 0.935 | 0.584         |
|           | C vs. F              | 1, 10    | 0.965 | 0.505         | 1, 11        | 0.797 | 0.693         |
|           | C vs. LR             | 1, 10    | 0.913 | 0.545         | 1, 11        | 0.534 | 0.954         |
|           | C vs. HR             | 1, 10    | 0.990 | 0.443         | 1, 11        | 1.293 | 0.210         |
|           | F vs. LR             | 1, 10    | 0.843 | 0.607         | 1, 11        | 0.602 | 0.904         |
|           | F vs. HR             | 1, 10    | 0.670 | 0.848         | 1, 11        | 1.328 | 0.156         |
|           | LR vs. HR            | 1, 10    | 0.486 | 0.972         | 1, 11        | 1.186 | 0.288         |
| 12 days   | Treatment            | 3, 9     | 0.881 | 0.676         | 3, 11        | 0.964 | 0.525         |
|           | C vs. F              | 1, 9     | 0.969 | 0.490         | 1, 11        | 0.387 | 0.950         |
|           | C vs. LR             | 1, 9     | 1.135 | 0.284         | 1, 11        | 0.690 | 0.656         |
|           | C vs. HR             | 1, 9     | 0.639 | 0.901         | 1, 11        | 1.522 | 0.147         |
|           | F vs. LR             | 1, 9     | 0.950 | 0.481         | 1, 11        | 0.617 | 0.734         |
|           | F vs. HR             | 1, 9     | 0.787 | 0.751         | 1, 11        | 1.501 | 0.183         |
|           | LR vs. HR            | 1, 9     | 1.064 | 0.358         | 1, 11        | 1.215 | 0.284         |
| 28 days   | Treatment            | 3, 11    | 0.941 | 0.571         | 3, 11        | 0.693 | 0.872         |
|           | C vs. F              | 1, 11    | 0.253 | 0.998         | 1, 11        | 0.478 | 0.922         |
|           | C vs. LR             | 1, 11    | 1.153 | 0.319         | 1, 11        | 0.383 | 0.961         |
|           | C vs. HR             | 1, 11    | 1.529 | 0.127         | 1, 11        | 1.089 | 0.371         |
|           | F vs. LR             | 1, 11    | 0.997 | 0.446         | 1, 11        | 0.439 | 0.954         |
|           | F vs. HR             | 1, 11    | 1.365 | 0.208         | 1, 11        | 1.391 | 0.181         |
|           | LR vs. HR            | 1, 11    | 0.531 | 0.903         | 1, 11        | 0.727 | 0.657         |
| 36 days   | Treatment            | 3, 11    | 0.291 | 0.143         | 3, 11        | 1.043 | 0.401         |
|           | C vs. F              | 1, 11    | 0.750 | 0.781         | 1, 11        | 1.368 | 0.178         |
|           | C vs. LR             | 1, 11    | 1.825 | <b>0.040*</b> | 1, 11        | 0.801 | 0.685         |
|           | C vs. HR             | 1, 11    | 1.004 | 0.424         | 1, 11        | 0.618 | 0.840         |
|           | F vs. LR             | 1, 11    | 1.908 | <b>0.022*</b> | 1, 11        | 1.478 | 0.107         |
|           | F vs. HR             | 1, 11    | 0.883 | 0.564         | 1, 11        | 1.720 | <b>0.043*</b> |
|           | LR vs. HR            | 1, 11    | 1.056 | 0.389         | 1, 11        | 0.355 | 0.988         |

**Supp. Table 3.** PERMANOVA table showing differences in the **bacterial** community structure among treatments and specific contrasts of treatments for all sampling dates and at each sampling times separately for riverbed and gravel samples. DF = degree of freedom: numerator, total. F = F value. P = P value.

|           | Factors / contrasts  | Riverbed |       |               | Gravel Plain |       |               |
|-----------|----------------------|----------|-------|---------------|--------------|-------|---------------|
|           |                      | DF       | F     | P             | DF           | F     | P             |
| All dates | Treatment            | 3, 83    | 3.183 | <b>0.001*</b> | 3, 83        | 3.882 | <b>0.001*</b> |
|           | Sampling             | 6, 83    | 3.800 | <b>0.001*</b> | 6, 83        | 5.129 | <b>0.001*</b> |
|           | Treatment : sampling | 18, 83   | 0.961 | 0.576         | 18, 83       | 1.269 | 0.074         |
| 4 h       | Treatment            | 3, 11    | 0.677 | 0.712         | 3, 11        | 0.409 | 0.997         |
|           | C vs. F              | 1, 11    | 0.317 | 0.794         | 1, 11        | 0.268 | 0.860         |
|           | C vs. LR             | 1, 11    | 0.761 | 0.537         | 1, 11        | 0.609 | 0.667         |
|           | C vs. HR             | 1, 11    | 0.847 | 0.436         | 1, 11        | 0.113 | 0.960         |
|           | F vs. LR             | 1, 11    | 1.294 | 0.297         | 1, 11        | 0.915 | 0.510         |
|           | F vs. HR             | 1, 11    | 0.943 | 0.461         | 1, 11        | 0.122 | 0.956         |
|           | LR vs. HR            | 1, 11    | 0.253 | 0.858         | 1, 11        | 0.815 | 0.578         |
| 1 day     | Treatment            | 3, 11    | 0.383 | 0.969         | 3, 11        | 0.993 | 0.452         |
|           | C vs. F              | 1, 11    | 0.863 | 0.437         | 1, 11        | 1.850 | 0.136         |
|           | C vs. LR             | 1, 11    | 0.421 | 0.794         | 1, 11        | 0.240 | 0.895         |
|           | C vs. HR             | 1, 11    | 0.277 | 0.902         | 1, 11        | 0.231 | 0.908         |
|           | F vs. LR             | 1, 11    | 0.338 | 0.868         | 1, 11        | 2.075 | 0.101         |
|           | F vs. HR             | 1, 11    | 0.649 | 0.622         | 1, 11        | 1.940 | 0.132         |
|           | LR vs. HR            | 1, 11    | 0.109 | 0.978         | 1, 11        | 0.063 | 0.984         |
| 2 days    | Treatment            | 3, 11    | 0.602 | 0.755         | 3, 11        | 0.621 | 0.862         |
|           | C vs. F              | 1, 11    | 0.435 | 0.680         | 1, 11        | 0.549 | 0.776         |
|           | C vs. LR             | 1, 11    | 1.577 | 0.235         | 1, 11        | 0.191 | 0.970         |
|           | C vs. HR             | 1, 11    | 0.805 | 0.401         | 1, 11        | 0.841 | 0.509         |
|           | F vs. LR             | 1, 11    | 0.646 | 0.503         | 1, 11        | 0.302 | 0.923         |
|           | F vs. HR             | 1, 11    | 0.239 | 0.845         | 1, 11        | 1.660 | 0.155         |
|           | LR vs. HR            | 1, 11    | 0.330 | 0.802         | 1, 11        | 0.613 | 0.738         |
| 8 days    | Treatment            | 3, 11    | 1.231 | 0.313         | 3, 11        | 2.370 | <b>0.015*</b> |
|           | C vs. F              | 1, 11    | 1.005 | 0.441         | 1, 11        | 0.781 | 0.567         |
|           | C vs. LR             | 1, 11    | 2.173 | 0.081         | 1, 11        | 5.370 | <b>0.001*</b> |
|           | C vs. HR             | 1, 11    | 1.699 | 0.159         | 1, 11        | 2.430 | 0.046         |
|           | F vs. LR             | 1, 11    | 0.879 | 0.493         | 1, 11        | 2.393 | 0.052         |
|           | F vs. HR             | 1, 11    | 0.150 | 0.957         | 1, 11        | 0.557 | 0.760         |
|           | LR vs. HR            | 1, 11    | 1.376 | 0.290         | 1, 11        | 0.844 | 0.533         |
| 12 days   | Treatment            | 3, 11    | 1.740 | 0.096         | 3, 11        | 4.98  | <b>0.012*</b> |
|           | C vs. F              | 1, 11    | 1.483 | 0.258         | 1, 11        | 0.247 | 0.856         |
|           | C vs. LR             | 1, 11    | 3.631 | <b>0.018*</b> | 1, 11        | 9.012 | <b>0.001*</b> |
|           | C vs. HR             | 1, 11    | 1.723 | 0.194         | 1, 11        | 0.359 | 0.773         |
|           | F vs. LR             | 1, 11    | 1.033 | 0.428         | 1, 11        | 5.348 | <b>0.022*</b> |
|           | F vs. HR             | 1, 11    | 0.108 | 0.970         | 1, 11        | 0.271 | 0.844         |
|           | LR vs. HR            | 1, 11    | 1.668 | 0.213         | 1, 11        | 6.536 | <b>0.005*</b> |
| 28 days   | Treatment            | 3, 11    | 2.309 | <b>0.044*</b> | 3, 11        | 0.982 | 0.501         |
|           | C vs. F              | 1, 11    | 1.445 | 0.217         | 1, 11        | 0.154 | 0.969         |
|           | C vs. LR             | 1, 11    | 3.131 | <b>0.027*</b> | 1, 11        | 1.014 | 0.458         |
|           | C vs. HR             | 1, 11    | 2.963 | <b>0.035*</b> | 1, 11        | 1.354 | 0.263         |
|           | F vs. LR             | 1, 11    | 1.759 | 0.154         | 1, 11        | 0.736 | 0.631         |
|           | F vs. HR             | 1, 11    | 0.899 | 0.473         | 1, 11        | 1.272 | 0.322         |
|           | LR vs. HR            | 1, 11    | 1.147 | 0.344         | 1, 11        | 1.496 | 0.215         |
| 36 days   | Treatment            | 3, 11    | 2.247 | <b>0.024*</b> | 3, 11        | 1.254 | 0.280         |
|           | C vs. F              | 1, 11    | 1.988 | 0.074         | 1, 11        | 0.076 | 0.985         |
|           | C vs. LR             | 1, 11    | 2.910 | <b>0.015*</b> | 1, 11        | 3.197 | <b>0.021*</b> |
|           | C vs. HR             | 1, 11    | 3.200 | <b>0.011*</b> | 1, 11        | 0.598 | 0.705         |
|           | F vs. LR             | 1, 11    | 0.601 | 0.729         | 1, 11        | 1.802 | 0.125         |
|           | F vs. HR             | 1, 11    | 1.260 | 0.297         | 1, 11        | 0.312 | 0.912         |
|           | LR vs. HR            | 1, 11    | 1.268 | 0.299         | 1, 11        | 1.772 | 0.129         |

## Supplementary Figure legend

**Supp. Fig. 1.** Resilience index  $Res_t$  evolution of the Fungal (A and C) and Bacterial (B and D) community structures after the initial disturbance (4h) and over the length of the experiment (1, 2, 8, 12, 28 and 36 days) for the different treatments (F, LR and HR). Points correspond to replicate microcosms for each treatment at each sampling time. Data of each treatment were fitted with robust linear models (RLM).

Supp. Fig. 1

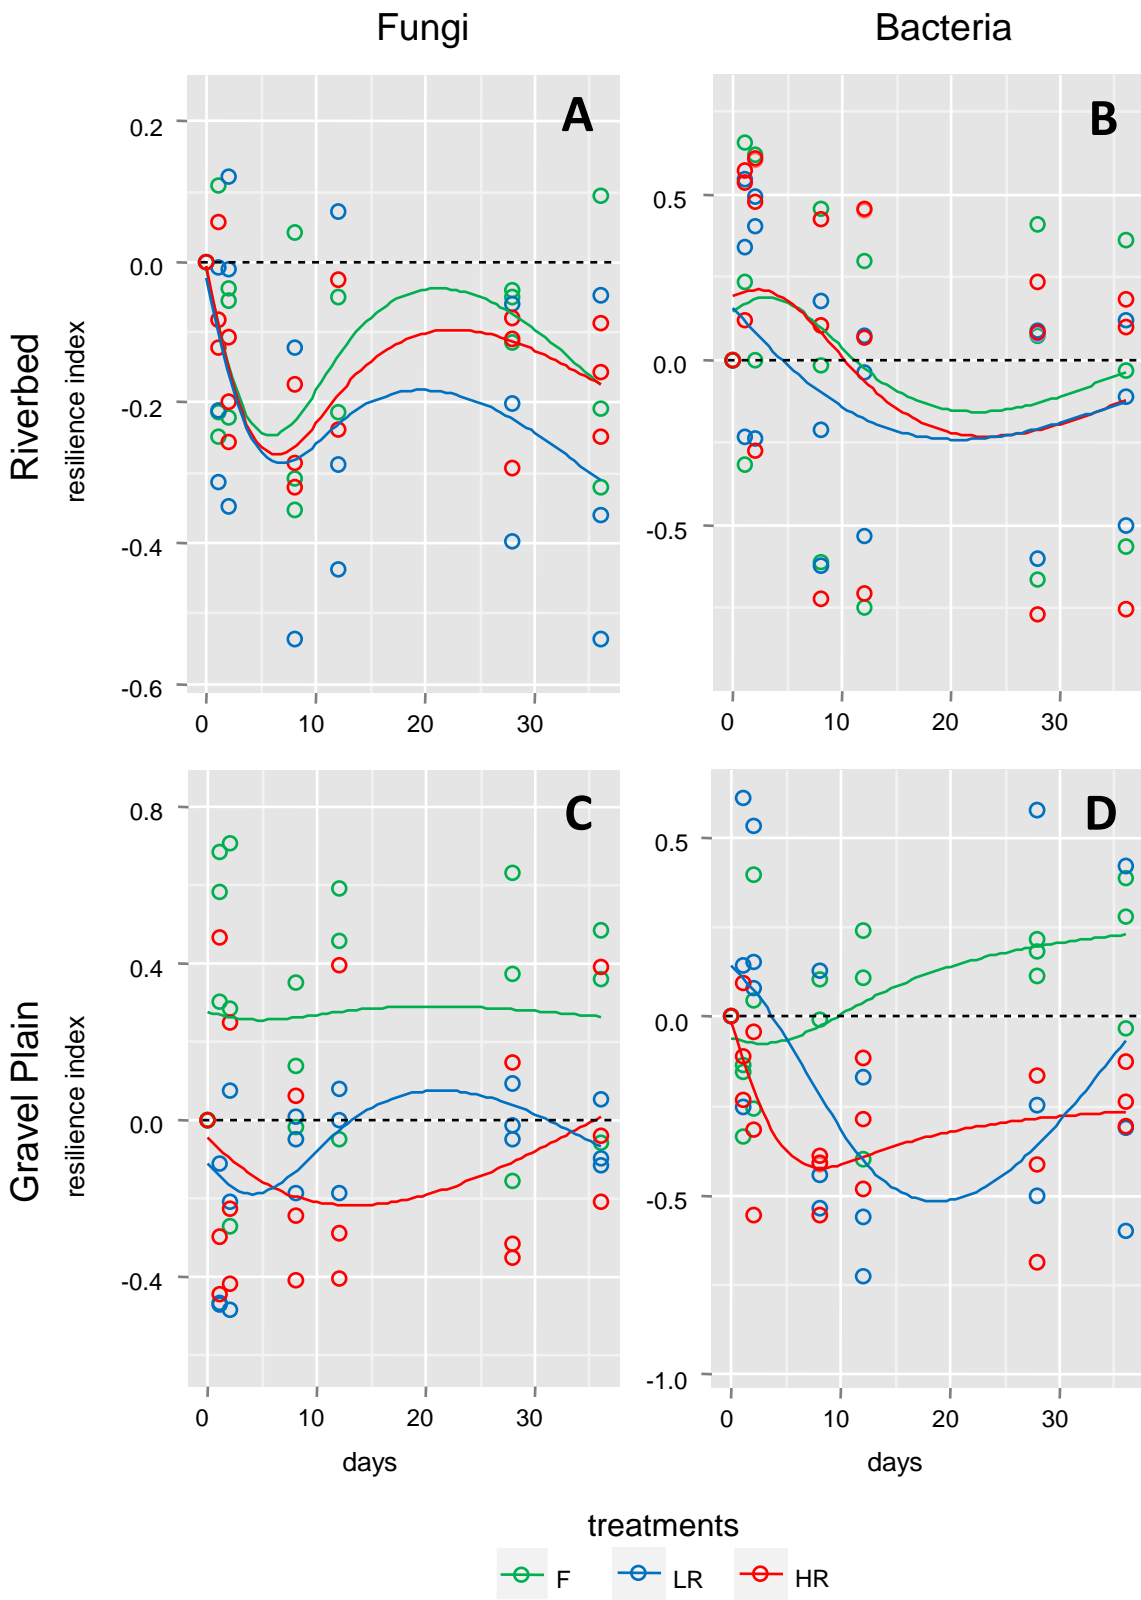

Supplement: srep12263-s1.pdf [file srep12263-s1.pdf]
